# Supplementary material
Source: publisher figshare collection journal article supplement (https://frontiersin.figshare.com/ndownloader/files/21931149)
Supplement: Supplementary file 1 [file 21931149]

## Sheet: Sheet1
Table S2: Taxonomic identity of 131 fungal cultures
Order	Family	Genus	Species	# of cultures
Amphisphaeriales	Pestalotiopsidaceae	Neopestalotiopsis	clavispora	1
Botryosphaeriales	Botryosphaeriaceae	Endomelanconiopsis	endophytica	5
			sp.	8
Capnodiales	Davidiellaceae	Cladosporium	antarcticum	1
			cladosporioides	4
Diaporthales	Diaporthaceae	Diaporthe	sp.	4
		Harknessia	australiensis	1
		Stenocarpella	maydis	1
Diaporthales	Valsaceae	Phomopsis	sp.	2
Eurotiales	Trichocomaceae	Aspergillus	vitricola	1
		Penicillium	brevicompactum	3
			hirsutum	1
Glomerellales	Glomerellaceae	Colletotrichum	fructicola	1
			gloeosporioides	36
			vietnamense	1
			sp.	5
Hypocreales	Bionectriaceae	Clonostachys	rosea	1
	Cordycipitaceae	Lecanicillum	muscarium	1
	Nectriaceae	Fusarium	avenaceum	2
			decemcellulare	3
			polyphialidicum	5
			sp.	1
Microthyriales	Microthyriaceae	Paramicrothyrium	sp.	1
Polyporales	Meruliaceae	Bjerkandera	adusta	3
	Polyporaceae	Coriolopsis	rigida	1
Russulales	Stereaceae	Stereum	gausapatum	5
Sordariales	Chaetomiaceae	Chaetomium	cuprem	1
			sp.	2
Sordariomycetes	F.	G.	sp.	5
Venturiales	Sympoventuriaceae	Ochroconis	gamsii	2
Xylariales	Amphisphaeriaceae	Oxydothis	sp.	1
		Pestalotia	elastica	1
	Hypoxylaceae	Hypoxylon	investiens	2
	Xylariaceae	Entonaema	sp.	1
		g.	sp.	1
		Muscodor	sp.	1
		Nemania	sp.	1
		Nodulisporium	sp.	2
		Xylaria	cf. heliscus	1
			sp.	5
		Xylariales	sp.	1
	F.	G.	sp.	4
